# Supplementary material for: Discovery of an uncovered region in fibrin clots and its clinical significance
Source: PubMed Central journal article supplement — Sci Rep. 2013 Sep 6;3:2604. doi: 10.1038/srep02604 (PMC3764439; doi:10.1038/srep02604), 2013-09-06
Supplement: srep02604-s1.pdf [file srep02604-s1.pdf]

## Supplementary Information

### Discovery of an uncovered region in fibrin clots and its clinical significance

Yohei Hisada<sup>1,2,+</sup>, Masahiro Yasunaga<sup>1,+</sup>, Shingo Hanaoka<sup>3</sup>, Shinji Saijou<sup>3</sup>, Takashi Sugino<sup>4</sup>, Atsushi Tsuji<sup>5</sup>, Tsuneo Saga<sup>5</sup>,  
Kouhei Tsumoto<sup>6</sup>, Shino Manabe<sup>7</sup>, Jun-ichiro Kuroda<sup>8</sup>, Jun-ichi Kuratsu<sup>8</sup>, Yasuhiro Matsumura<sup>1,2,\*</sup>

## **Materials and Methods**

### **Immunofluorescence staining of fibrin clots**

Fibrin clots were generated in vitro. In brief, fibrinogen (20 mg/mL) was mixed with 0.1 M CaCl<sub>2</sub> and thrombin (200 NIH units/mL) in TBS for 1 hour at 37° C. The fibrin clot was then filled with OCT compound (Sakura Finetek) and frozen with dry ice. The frozen fibrin clot was then cut into 6- $\mu$ m-thick sections using a Tissue-Tek Cryo3 (Sakura Finetek). The sections were washed with PBS for 5 minutes and blocked with 4% Difco skim milk in PBS for 30 minutes at room temperature. After washing, Alexa Fluor 647-labelled mAb was added at a dilution of 1:100, followed by incubation for 30 minutes at room temperature. The sections were then washed three times with PBS. Finally, the sections were mounted using Fluoromount-G (Southern Biotech, Birmingham, AL, USA) for observation with a BZ-9000 (Keyence, Osaka, Japan).

### **Competition ELISA for anti-B $\beta$ -mAb and anti- $\gamma$ -mAb**

For the ELISA, 10  $\mu$ g/mL peroxidase-conjugated anti-B $\beta$  mAb was mixed with an equal volume of PBS, 100  $\mu$ g/mL of anti-B $\beta$  mAb, and 100  $\mu$ g/mL of anti- $\gamma$  mAb. Next, 100  $\mu$ L of each mixture was applied to fibrin-coated 96-well plates. For 1  $\mu$ g/mL peroxidase-conjugated anti- $\gamma$  mAb, 10  $\mu$ g/mL of anti-B $\beta$  mAb and 10  $\mu$ g/mL of anti- $\gamma$  mAb were used. All incubations were performed for 1 hour. Subsequently, the wells were washed with TBS-T. Finally, the antibodies bound to the wells were visualised using the 1-Step Slow TMB ELISA as a substrate for 30 minutes.

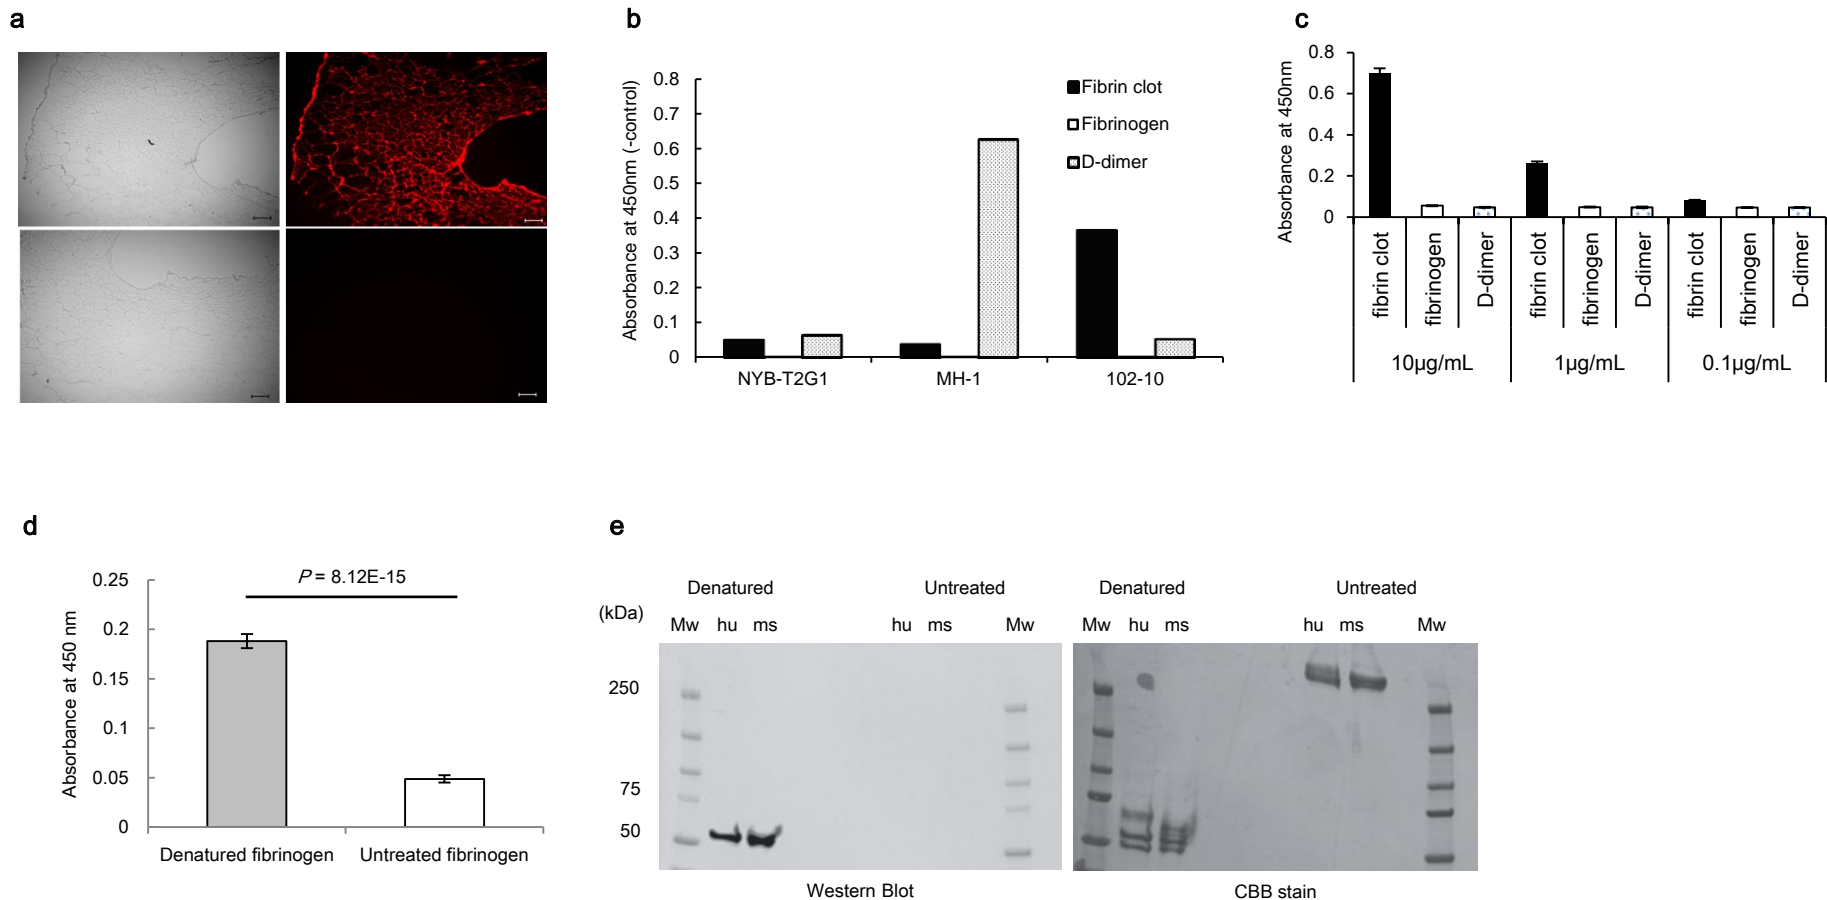

**Supplementary Figure 1** Characterization of 102-10 mAb. **(a)** Immunohistochemistry was performed on a fibrin clot using Alexa Fluor 647-conjugated 102-10 mAb (upper) and control IgG (Cetuximab, lower). Only the 102-10 mAb reacted with the fibrin clot. Scale bar, 100  $\mu$ m. **(b)** A comparison of the 102-10 mAb was performed with previously studied anti-fibrin antibodies. **(c)** To clarify the specificity of the 102-10 mAb, we prepared a fibrinogen plate, a D-dimer plate, and a fibrin clot plate. The peroxidase-conjugated 102-10 mAb (0.1, 1.0, and 10.0  $\mu$ g/mL) was incubated in each plate ( $n = 8$ ). The results are presented as the means  $\pm$  s.d. **(d)** The reactivity of 102-10 mAb against fibrinogen under reducing, heat-shocked (denatured), and untreated conditions was examined ( $n = 7$ ). The results are presented as the means  $\pm$  s.d. **(e)** The 102-10 mAb was reactive to human (hu) and mouse (ms) fibrinogen under denatured conditions but not to fibrinogen under untreated conditions.

**a**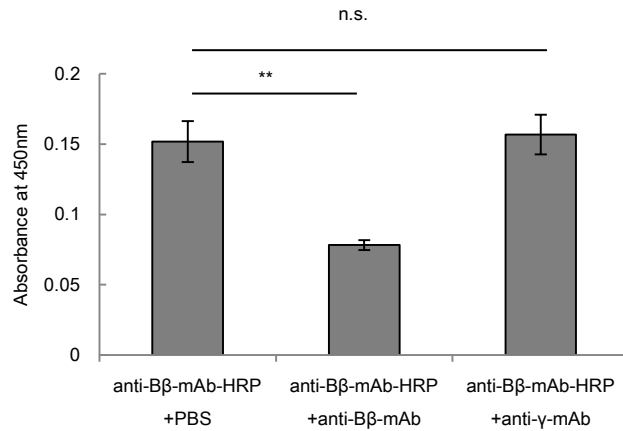**b**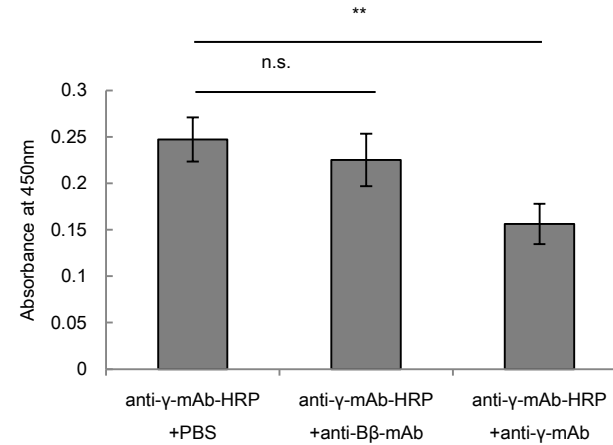

**Supplementary Figure 2** Search of the area of the unique hole in a fibrin clot by competition ELISA. **(a)** The binding of peroxidase-conjugated anti-B $\beta$  mAb (anti-B $\beta$  mAb-HRP) to the fibrin clot was blocked by the cold anti-B $\beta$  mAb but not the cold anti- $\gamma$  mAb. **(b)** The binding of peroxidase-conjugated anti- $\gamma$  mAb (anti- $\gamma$  mAb-HRP) to the fibrin clot was blocked by the cold anti- $\gamma$  mAb but not the cold anti-B $\beta$  mAb ( $n = 8$ ). The results are presented as the means  $\pm$  s.d., \*\*  $P < 0.01$ .

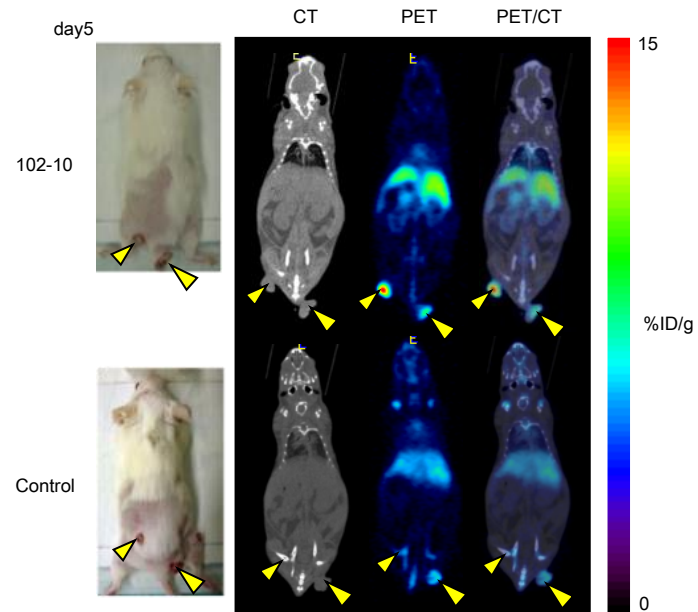

**Supplementary Figure 3** PET/CT with  $^{89}\text{Zr}$ -labelled 102-10 in whole body of spontaneous tumour models. Compared with the  $^{89}\text{Zr}$ -labelled control IgG (cetuximab), the  $^{89}\text{Zr}$ -labelled 102-10 mAb PET probe accumulated more specifically in tumour. The yellow arrows indicated tumours.

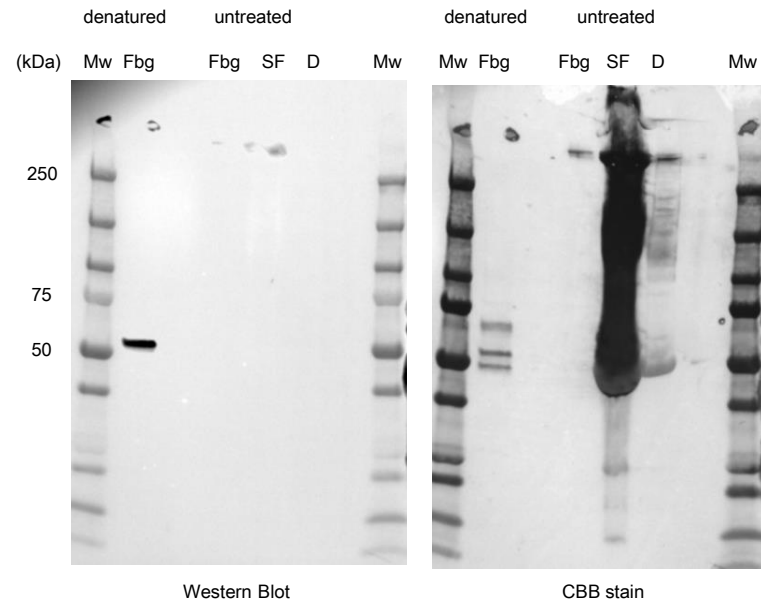

**Supplementary Figure 4** Comparing CBB staining with western blot. The 102-10 mAb reacted with the B $\beta$ -chain of denatured fibrinogen (Fbg) but did not recognize untreated fibrinogen, soluble fibrin (SF), and D-dimer (D). In the CBB, SF showed smear pattern indicating several sizes of self assembly of soluble fibrin. D-dimer consists of several sizes of degradation products of fibrin clots.

**Supplementary Table 1** Summary of the appearance of fibrin in malignant and non-malignant diseases

## Appearance of fibrin in malignant diseases\*

|              | Glioblastoma (GBM) | Lung cancer (LC) | Pancreatic cancer (PC) | Ovarian cancer (OC) | Gastric Cancer (GC) | Malignant lymphoma (ML) |
|--------------|--------------------|------------------|------------------------|---------------------|---------------------|-------------------------|
| No. positive | 15                 | 4                | 6                      | 3                   | 10                  | 0                       |
| No. negative | 0                  | 0                | 1                      | 0                   | 0                   | 5                       |

\*Itemization of each cancer:

GBM: Glioblastoma in 15 patients (pts); LC: Adenocarcinoma in 4 pts; PC: Well-differentiated adenocarcinoma in 7 pts; OC: Mucinous type in 2 pts and clear cell type in 1 pts; GC: Intestinal type in 2 pts and diffuse type in 8 pts; ML: Hodgkin lymphoma in 1 pts and diffuse large B-cell lymphoma in 4 pts.

## Appearance of fibrin in non-malignant diseases

|              | Acute myocardial infarction | Old myocardial infarction | Acute cerebral infarction | Old cerebral infarction | Acute pancreatitis | Chronic pancreatitis |
|--------------|-----------------------------|---------------------------|---------------------------|-------------------------|--------------------|----------------------|
| No. positive | 2                           | 0                         | 4                         | 0                       | 4                  | 0                    |
| No. negative | 0                           | 2                         | 0                         | 2                       | 0                  | 3                    |

Positive: Fibrin deposition was found in more than 30% of the microscopic field.

Negative: No fibrin deposition was found.
